# Supplementary material for: Predictive models of medication non-adherence risks of patients with T2D based on multiple machine learning algorithms
Source: PubMed Central journal article supplement (PMC7064141; doi:10.1136/bmjdrc-2019-001055), 2020-03-09

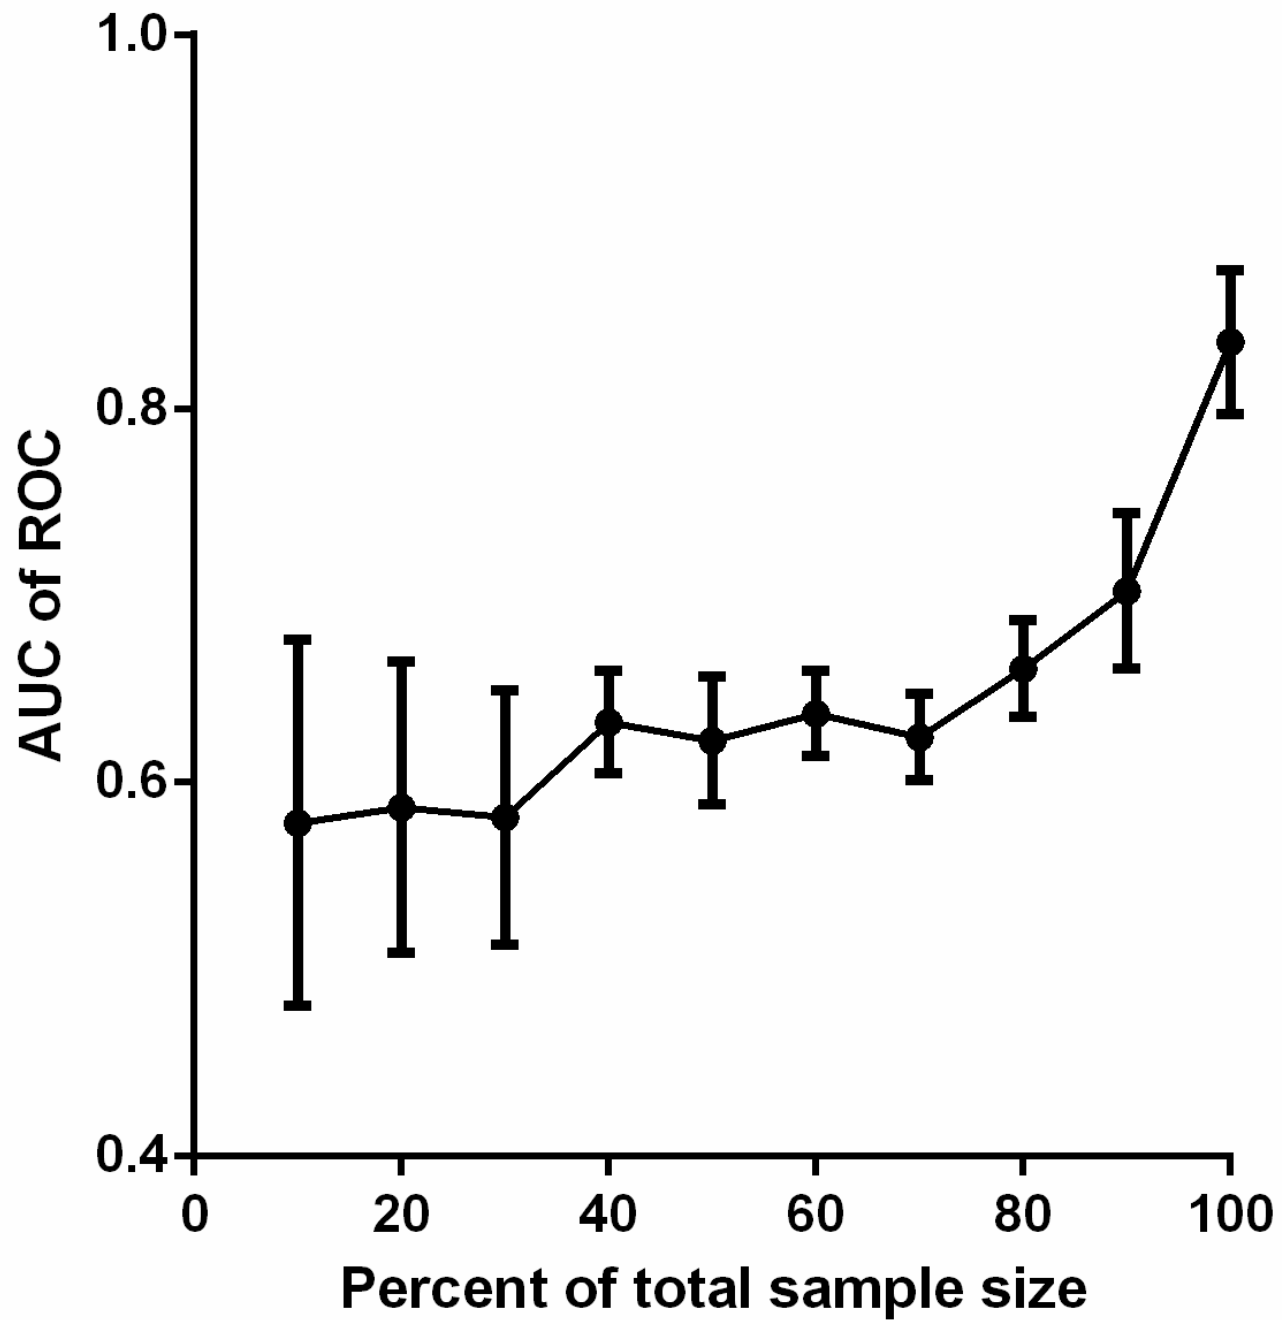

Supplement: bmjdrc-2019-001055supp002.pdf [file bmjdrc-2019-001055supp002.pdf]
